# Supplementary material for: Identification and Expression Profile of CLE41/44-PXY-WOX Genes in Adult Trees Pinus sylvestris L. Trunk Tissues during Cambial Activity
Source: MDPI journal article supplement (doi:10.3390/plants12040835), 2023-02-13
Supplement: s1 [file s1]

a

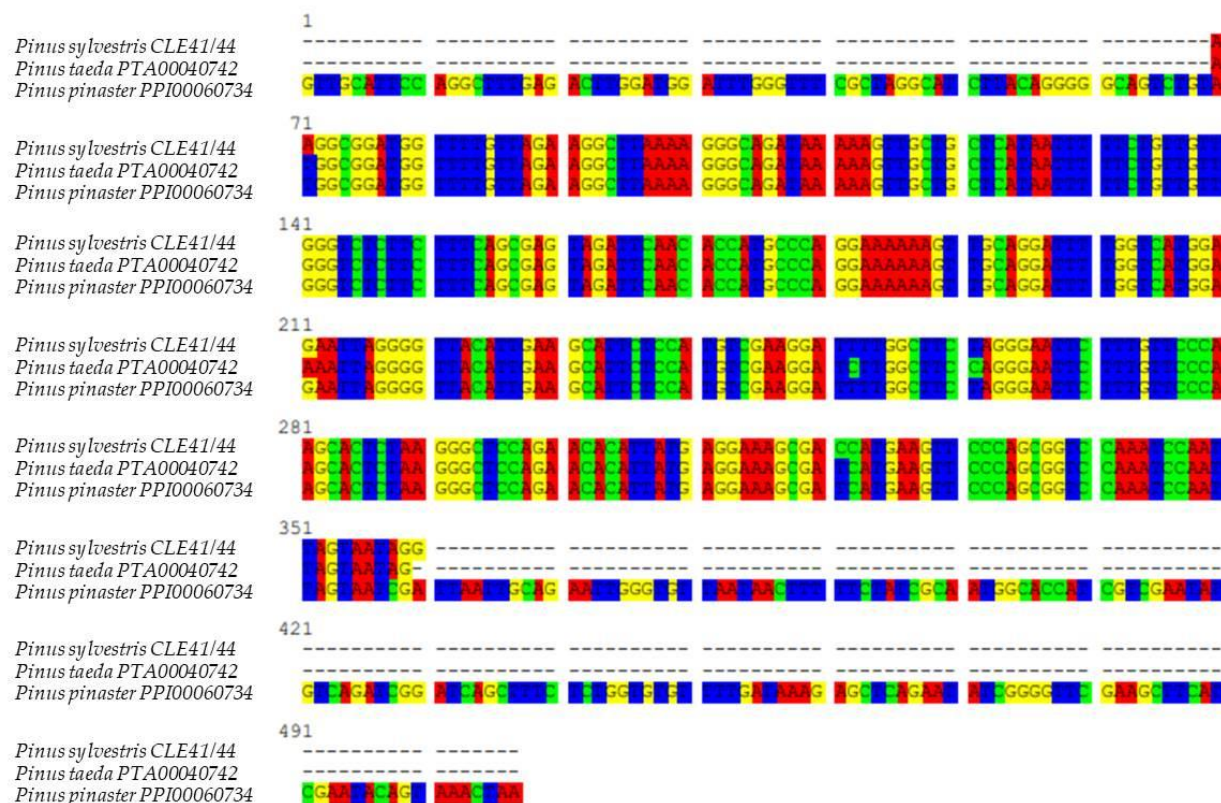

b

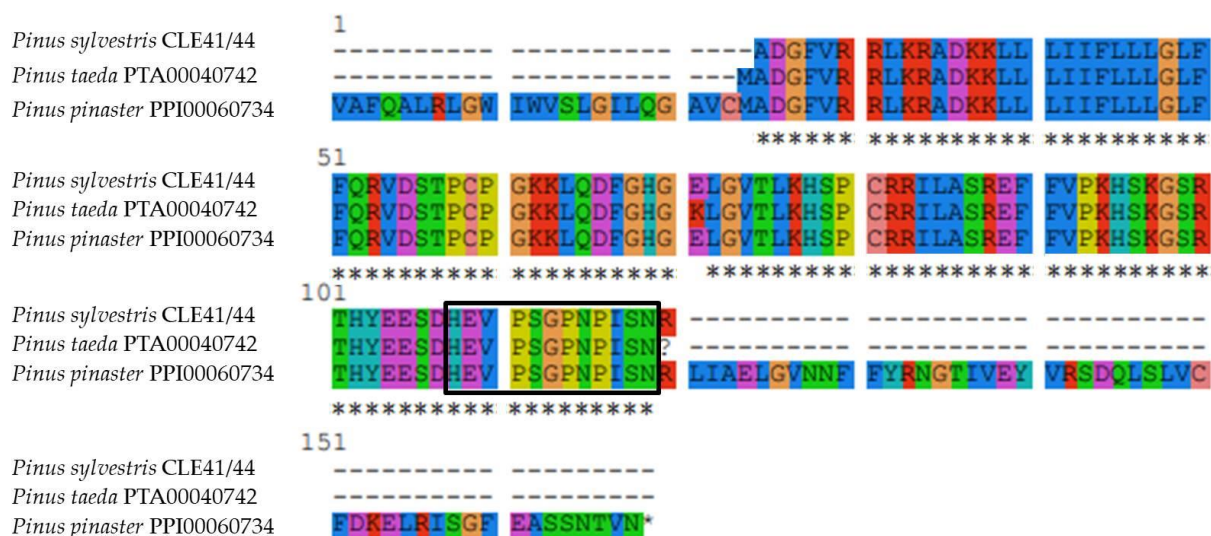

**Supplementary Materials Figure S1:** An alignment of the nucleotide (a) and amino acid (b) sequences of CLE41/44 from *P. pinaster* and *P. taeda* with the sequence derived from *P. sylvestris* cloned DNA. Putative CLE peptide sequences are in black rectangle. Asterisks indicate identical amino acids. Alignment was performed using SeaView v.4 software.
