# Supplementary material for: Identification and Expression Profile of CLE41/44-PXY-WOX Genes in Adult Trees Pinus sylvestris L. Trunk Tissues during Cambial Activity
Source: MDPI journal article supplement (doi:10.3390/plants12040835), 2023-02-13
Supplement: s1 [file s1]

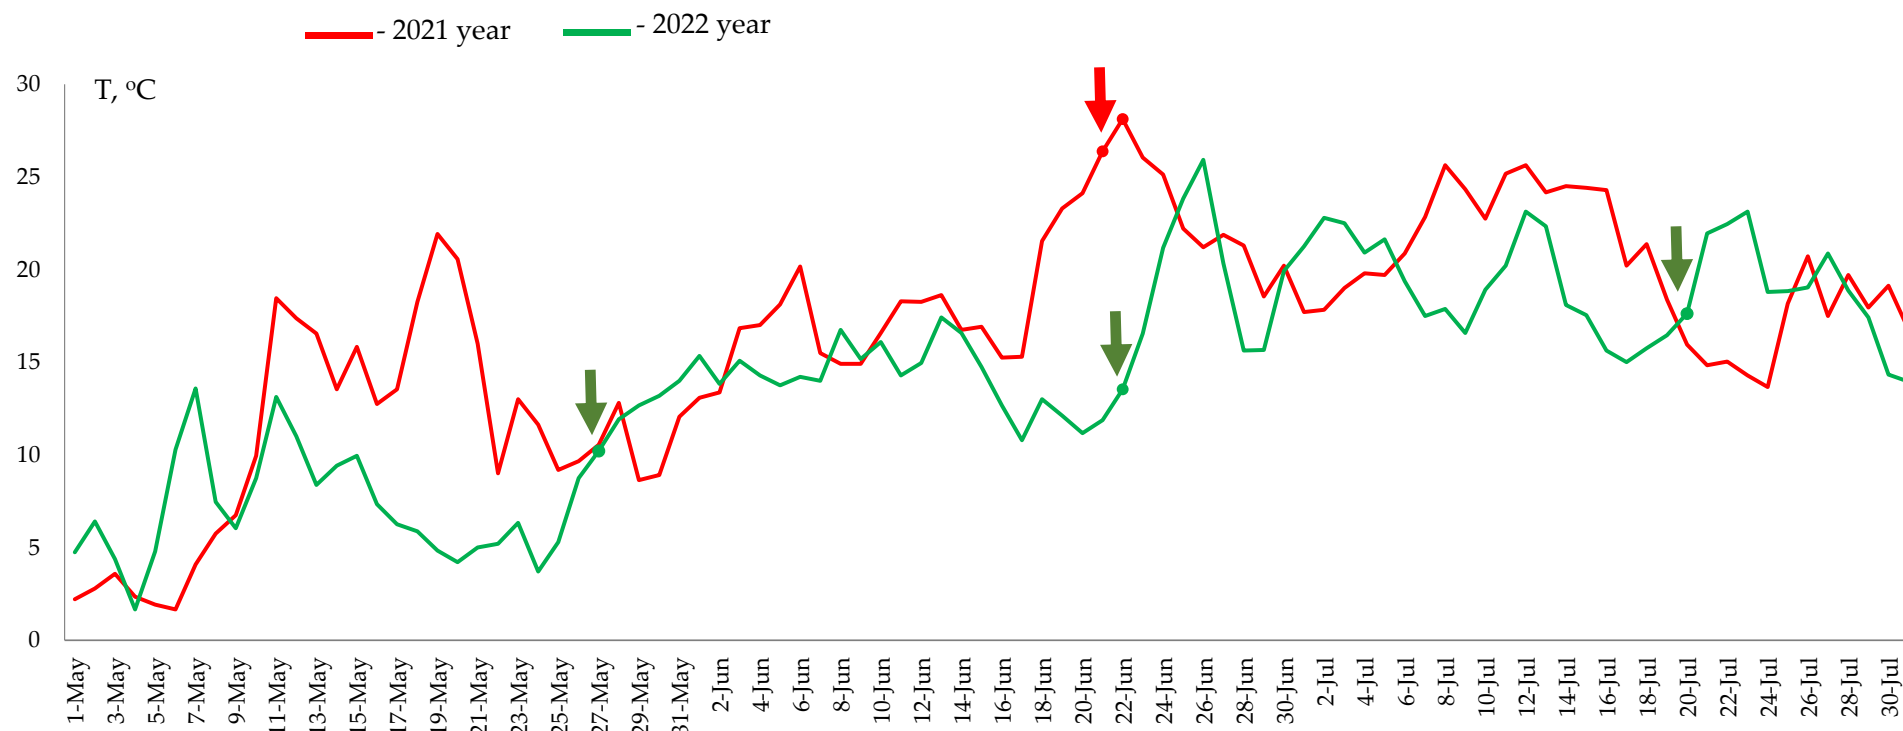

**Supplementary Materials: Figure S3**

The dynamics of daily average temperature during May-July 2021 and 2022 at the sampling sites. The arrows indicate sampling dates.
