# Supplementary material for: Identification and Expression Profile of CLE41/44-PXY-WOX Genes in Adult Trees Pinus sylvestris L. Trunk Tissues during Cambial Activity
Source: MDPI journal article supplement (doi:10.3390/plants12040835), 2023-02-13
Supplement: s1 [file s1]

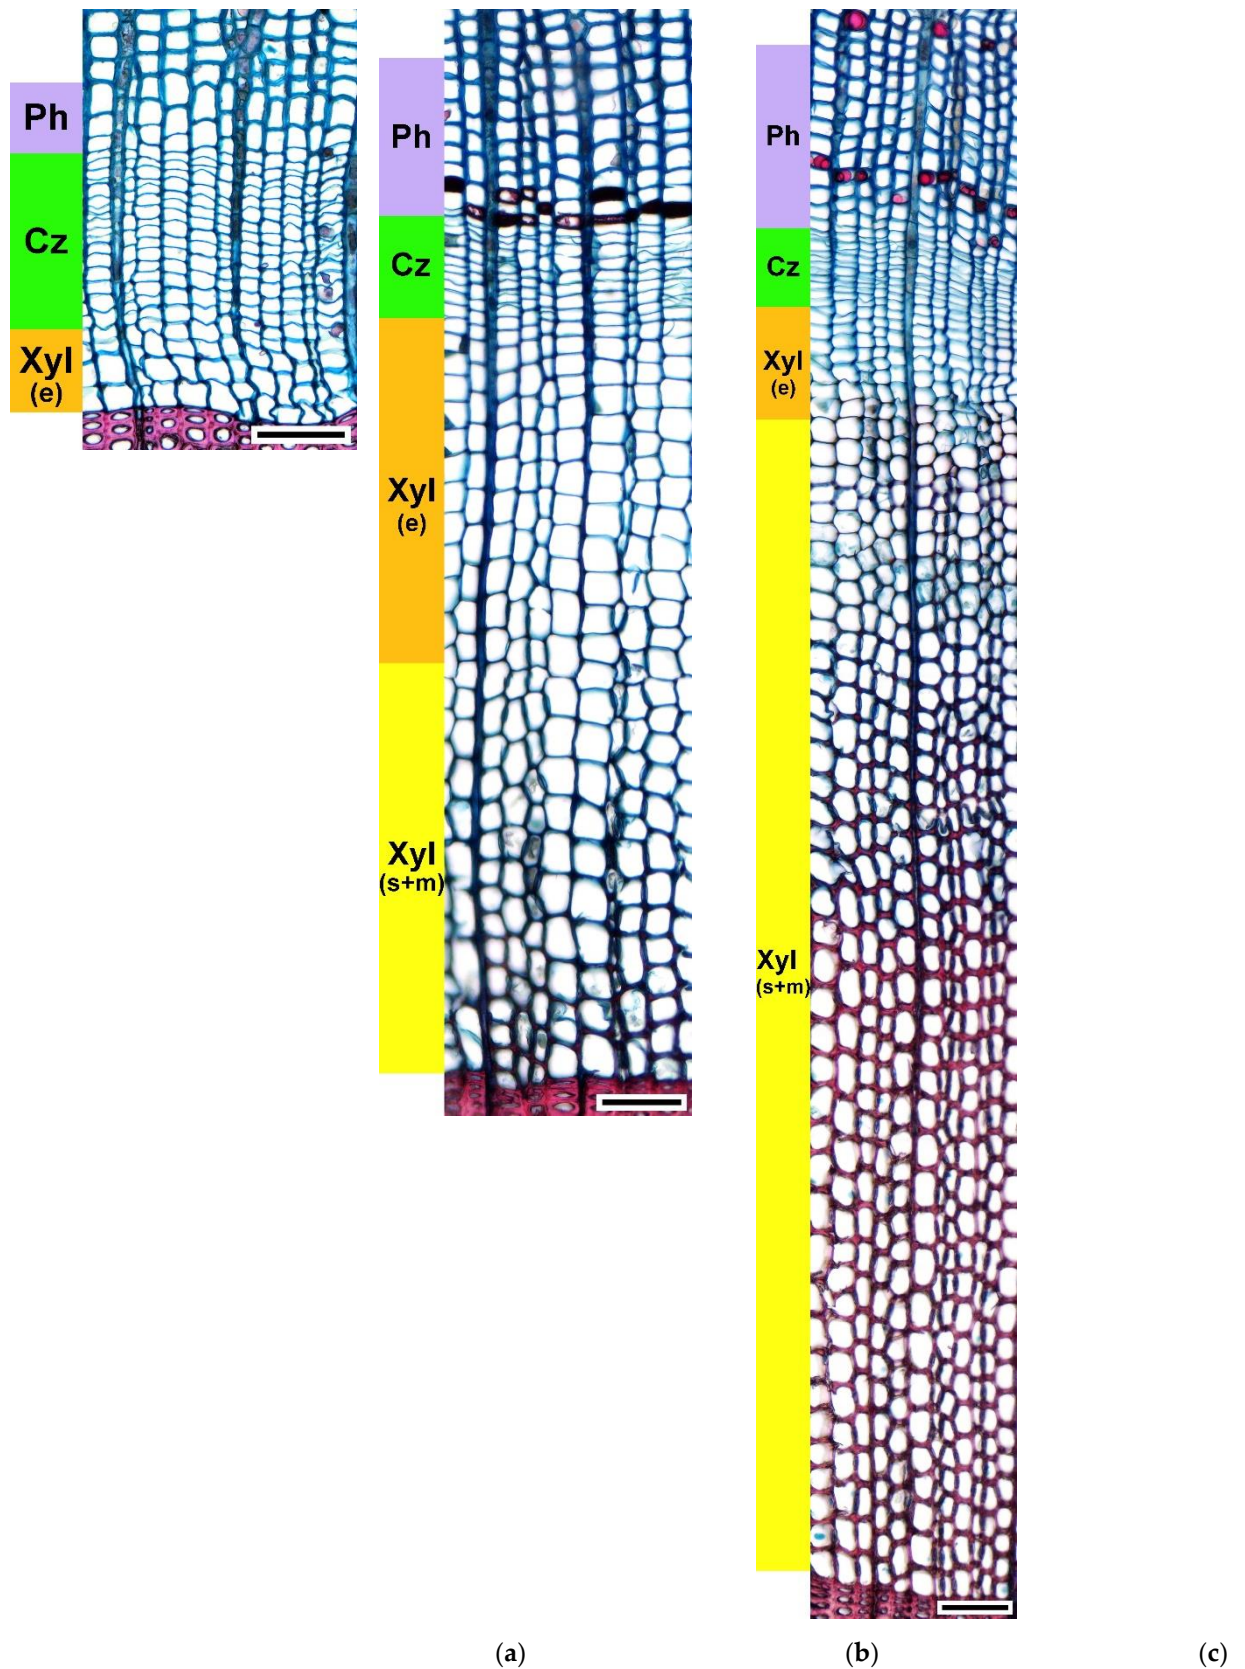

**Supplementary Materials: Figure S2**

Transverse trunk tissue sections include conductive phloem (Ph), cambial zone (Cz), expanding cells (Xyl (e)) and cells, which are forming secondary cell wall, and mature cells (Xyl (s+m)) of current year xylem in 40-year-old pine trees. Scale bar = 100  $\mu\text{m}$ . Samples were collected on May 27 (a), June 21 (b) and July 21 (c), 2022.
